# Supplementary figures and images for: A tethered delivery mechanism explains the catalytic action of a microtubule polymerase
Source: eLife journal article supplement (doi:10.7554/elife.03069), 2014-08-05

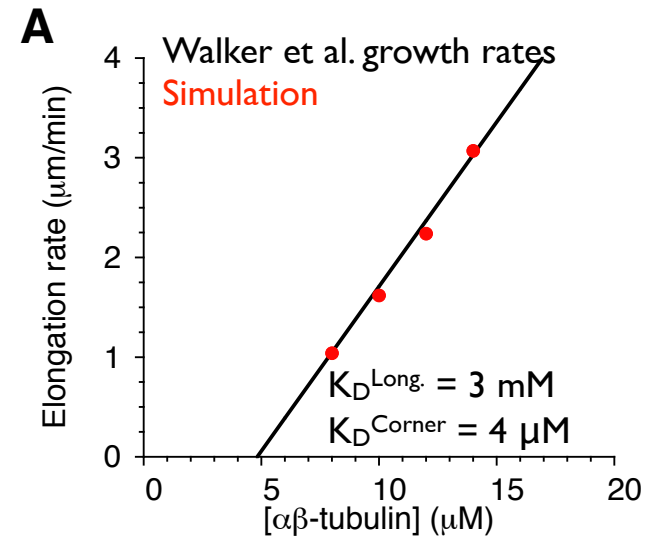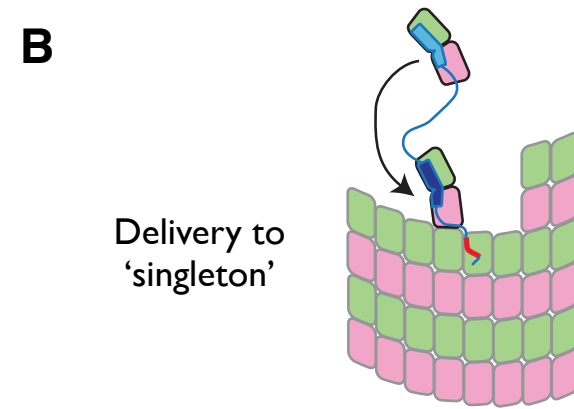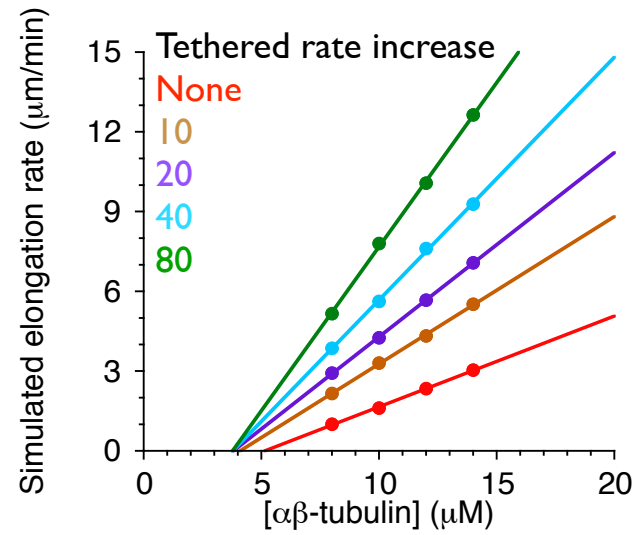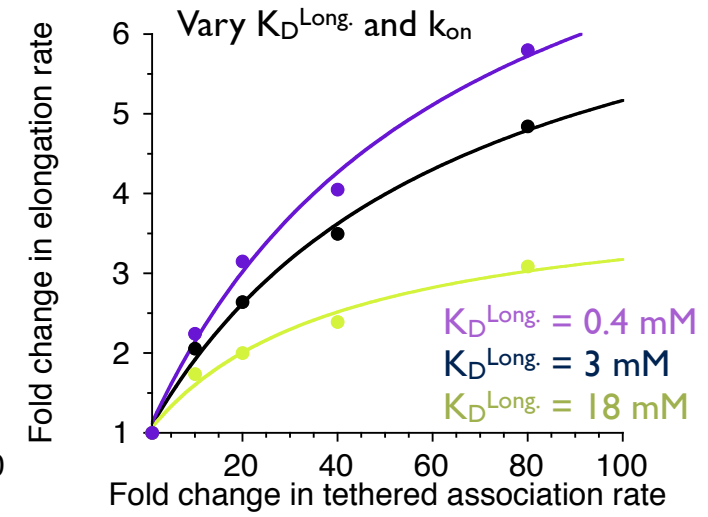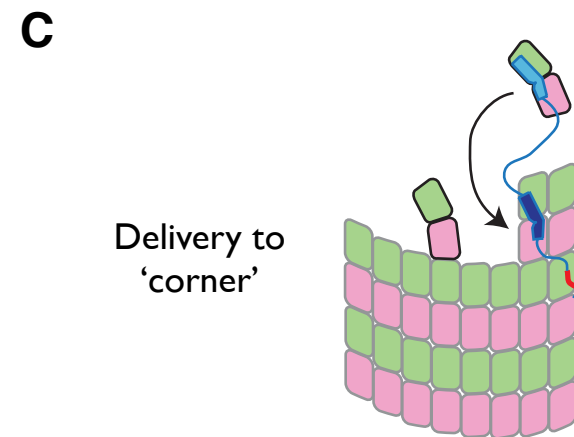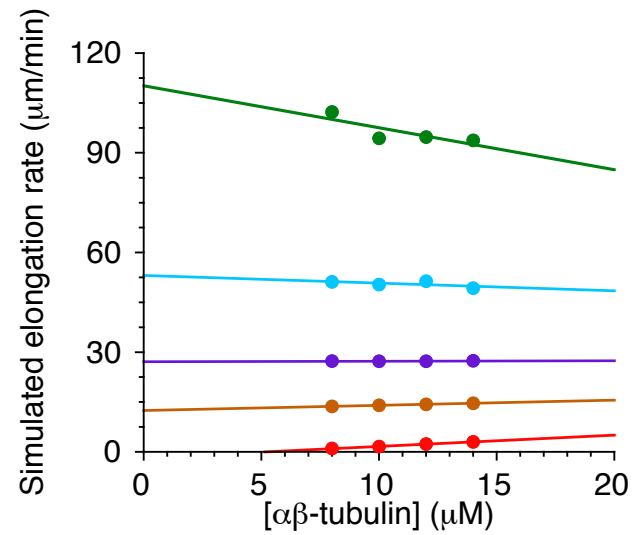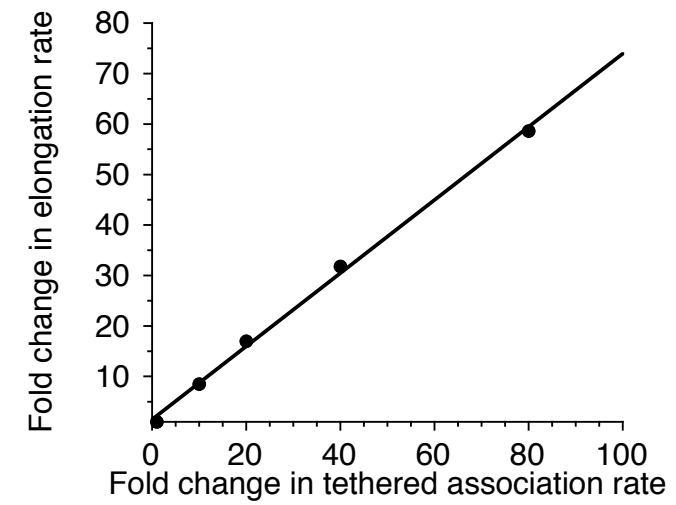

Supplement: supp [file elife-03069-supp-v1.zip]
